# Supplementary material for: Mie theory and the dichroic effect for spherical gold nanoparticles: an experimental approach
Source: Royal Society of Chemistry journal article supplement (doi:10.1039/d1na00148e), 2021-01-01
Supplement: d1na00148e2.pdf [file d1na00148e2.pdf]

## **Supplementary Information**

### **Mie theory and the dichroic effect for spherical gold nanoparticles: an experimental approach**

Emma G. Wigglesworth<sup>\*a,b</sup> and James H. Johnston<sup>a,b</sup>

<sup>a</sup>School of Chemical and Physical Sciences, Victoria University of Wellington, Wellington 6140, New Zealand.

<sup>b</sup>NZ Product Accelerator, The University of Auckland 1142, New Zealand.

Email: emma.wigglesworth@vuw.ac.nz

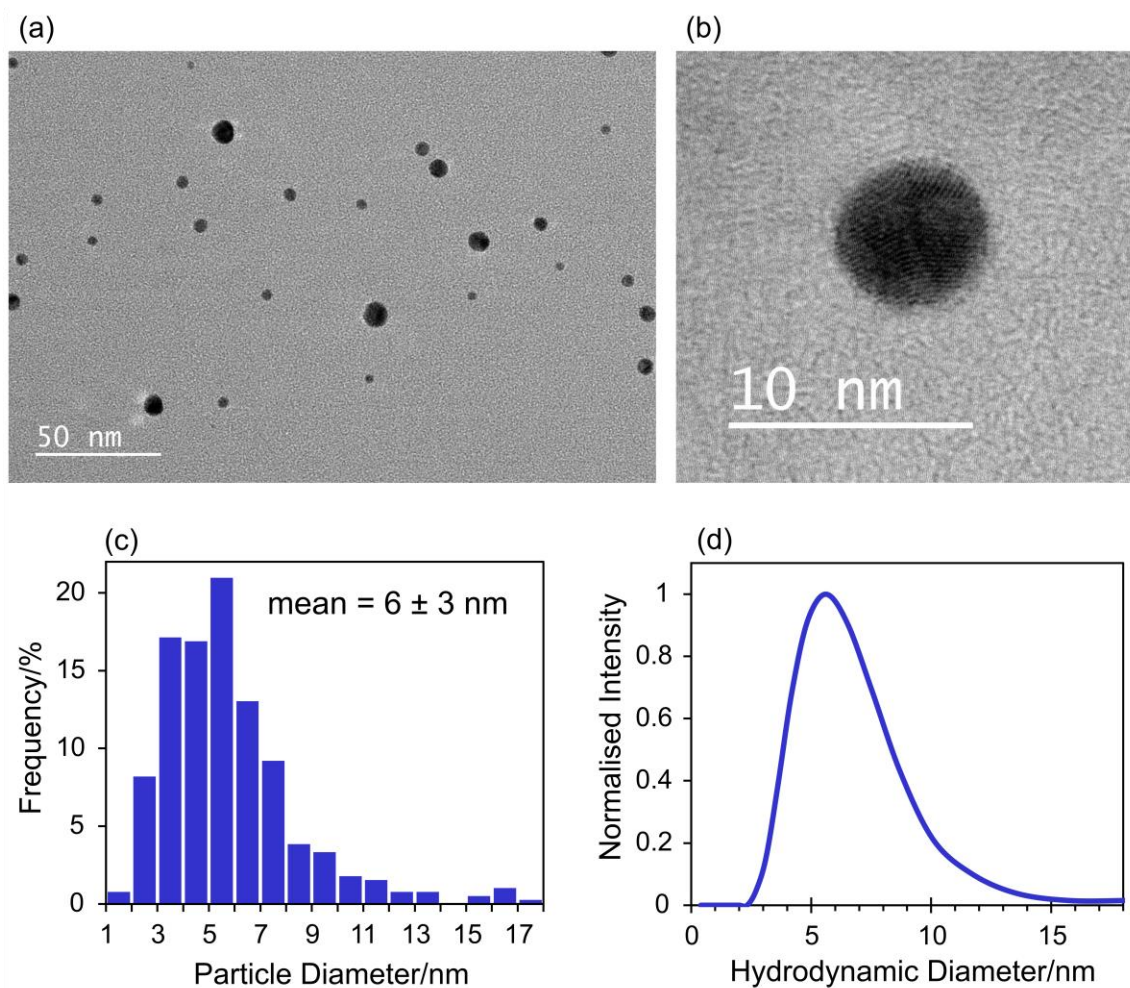

**Figure S1.** Size analysis of seed nanoparticles used to synthesise spherical gold nanoparticle colloids. (a) Low and (b) high magnification TEM images. (c) Corresponding histogram composed from analysis of 391 particles. (d) Normalised dynamic light scattering hydrodynamic diameter distribution.

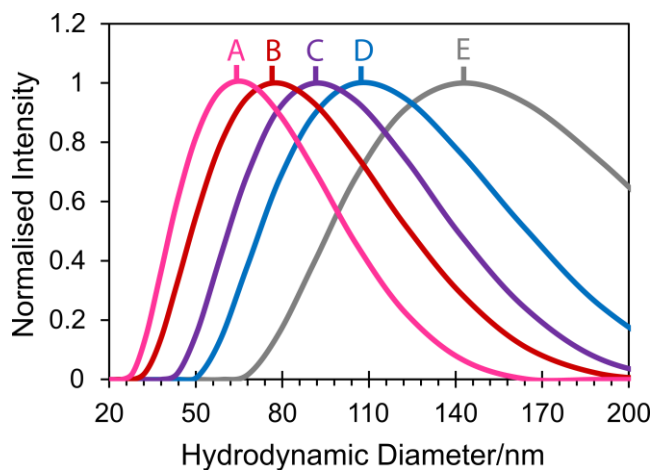

**Figure S2.** Normalised dynamic light scattering hydrodynamic diameter distributions of synthesised gold nanoparticle samples A to E.

|                                         | A          | B          | C          | D          | E            |
|-----------------------------------------|------------|------------|------------|------------|--------------|
| Particle diameter (TEM analysis)/nm     | $32 \pm 3$ | $53 \pm 4$ | $81 \pm 6$ | $94 \pm 9$ | $127 \pm 10$ |
| Hydrodynamic diameter (DLS analysis)/nm | 68         | 79         | 91         | 106        | 142          |

**Table S1.** Comparison between the particle diameters measured via transmission electron microscopy (TEM) analysis, and the hydrodynamic diameters measured via dynamic light scattering (DLS) analysis, for synthesised gold nanoparticle samples A to E.

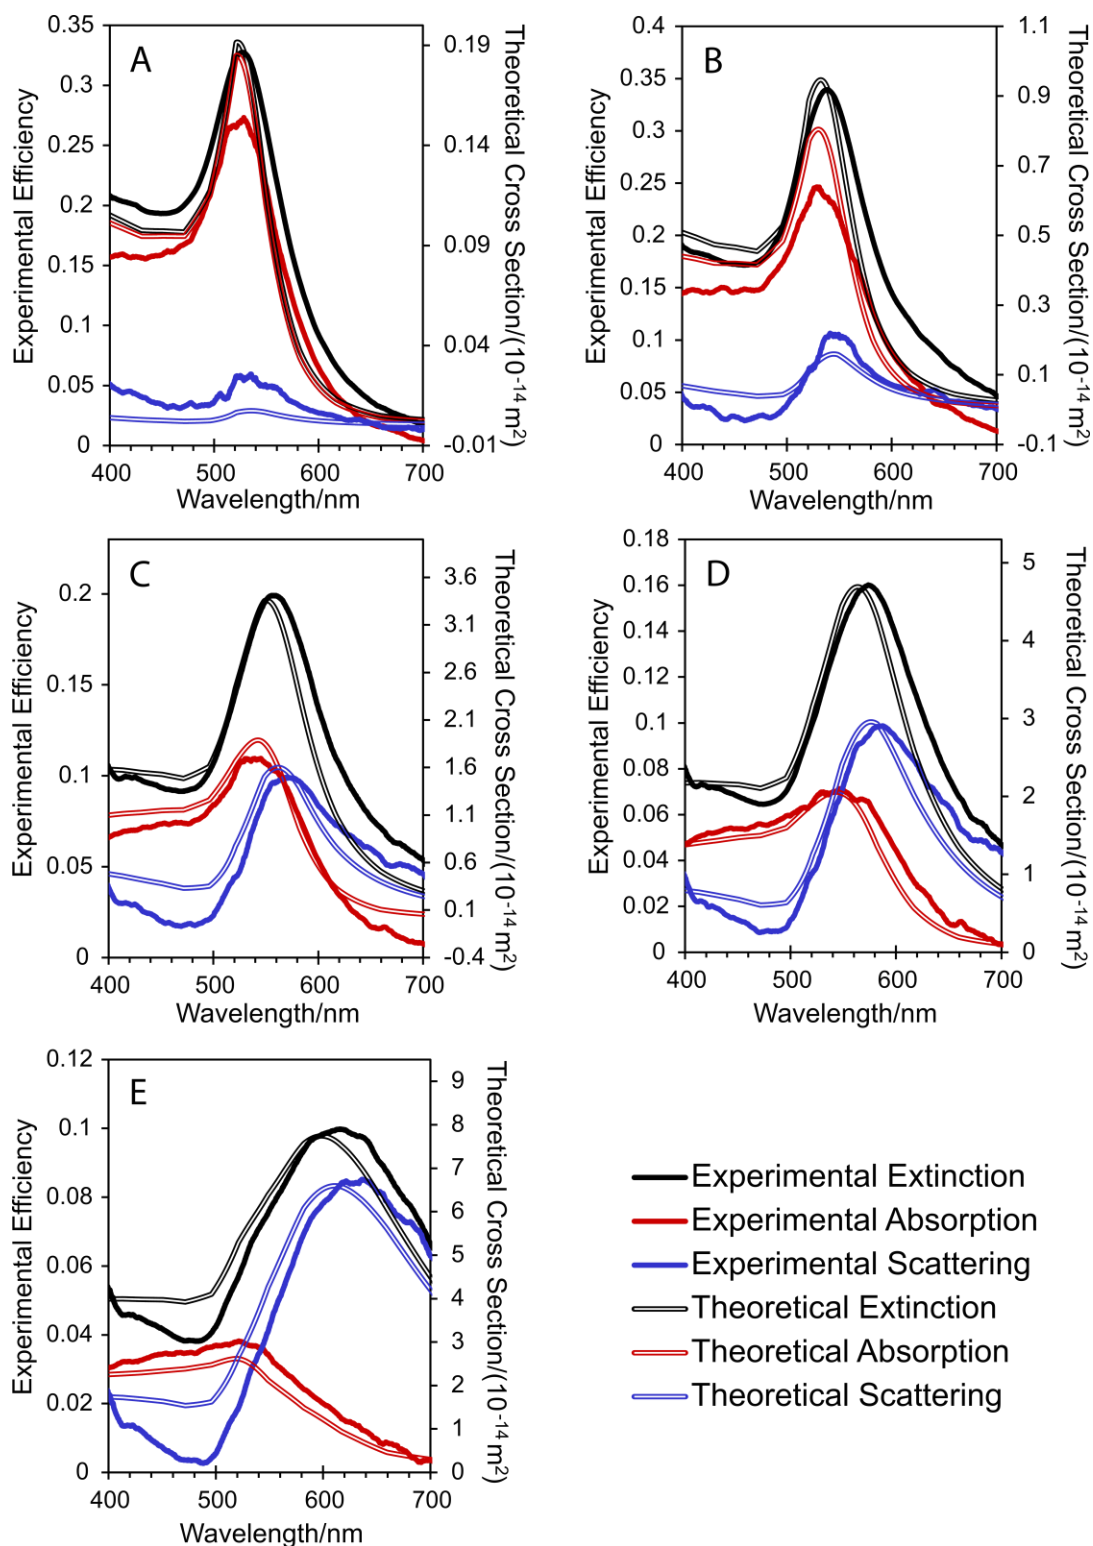

**Figure S3.** Comparison between experimentally measured (using CloudSpec spectroscopy, solid lines) and theoretically calculated (using Mie theory, double lines) extinction (black), absorption (red), and scattering (blue) spectra.

|                                                             | A   | B   | C   | D   | E   |
|-------------------------------------------------------------|-----|-----|-----|-----|-----|
| Experimental<br>Extinction $\lambda_{\text{max}}/\text{nm}$ | 528 | 537 | 558 | 573 | 613 |
| Theoretical<br>Extinction $\lambda_{\text{max}}/\text{nm}$  | 522 | 532 | 550 | 562 | 596 |
| Experimental<br>Scattering $\lambda_{\text{max}}/\text{nm}$ | 535 | 545 | 569 | 587 | 636 |
| Theoretical<br>Scattering $\lambda_{\text{max}}/\text{nm}$  | 536 | 545 | 561 | 575 | 608 |
| Experimental<br>Absorption $\lambda_{\text{max}}/\text{nm}$ | 528 | 529 | 539 | 547 | 522 |
| Theoretical<br>Absorption $\lambda_{\text{max}}/\text{nm}$  | 522 | 530 | 542 | 543 | 519 |

**Table S2.** Comparison between experimentally measured (using CloudSpec spectroscopy) and theoretically calculated (using Mie theory) extinction, scattering, and absorption  $\lambda_{\text{max}}$  values, obtained from the spectra in Figure S3.
